# Supplementary material for: Association between statewide financial incentive programs and COVID-19 vaccination rates
Source: PubMed Central journal article supplement (PMC8966995; doi:10.1371/journal.pone.0263425), 2022-03-30
Supplement: pone.0263425.s001.pdf [file pone.0263425.s001.pdf]

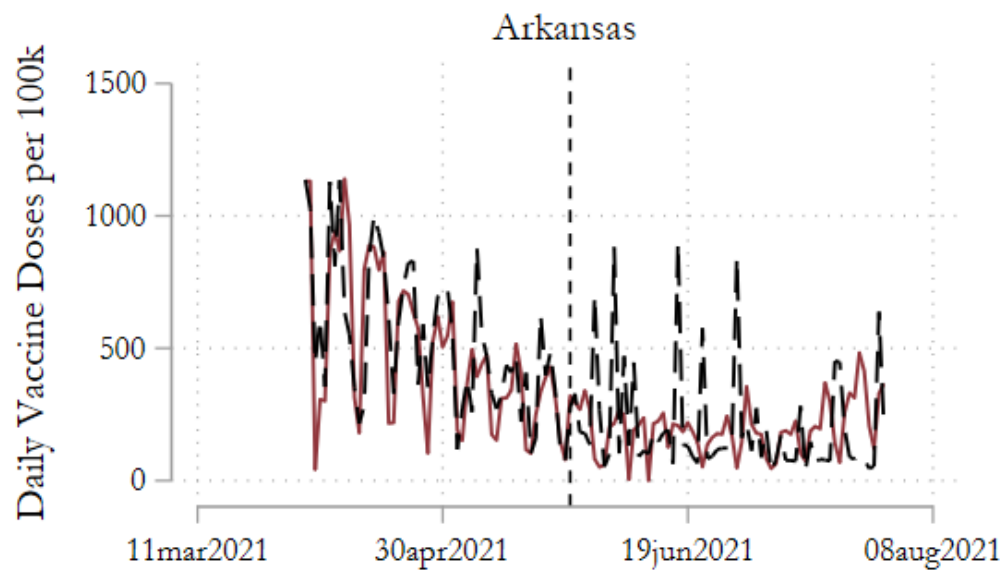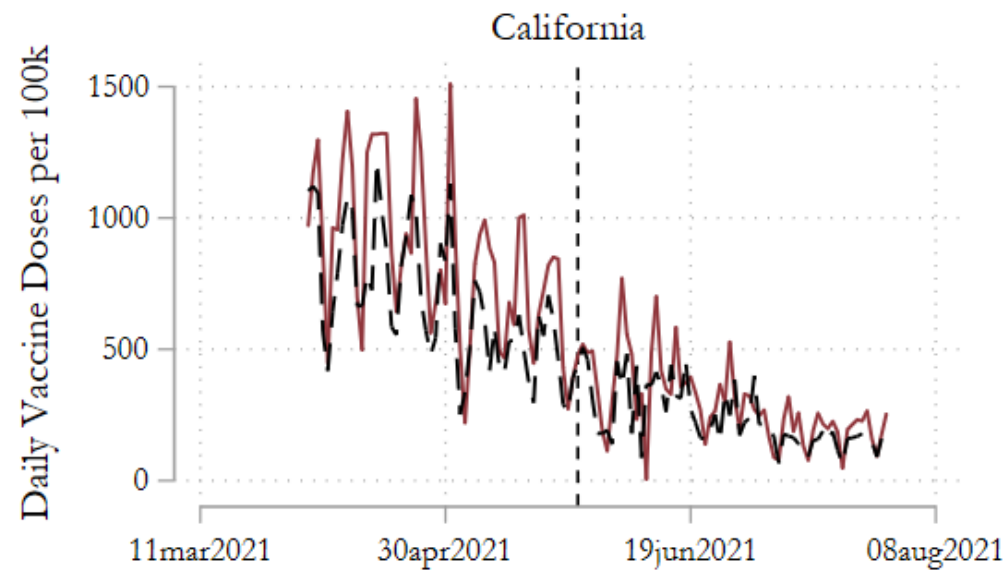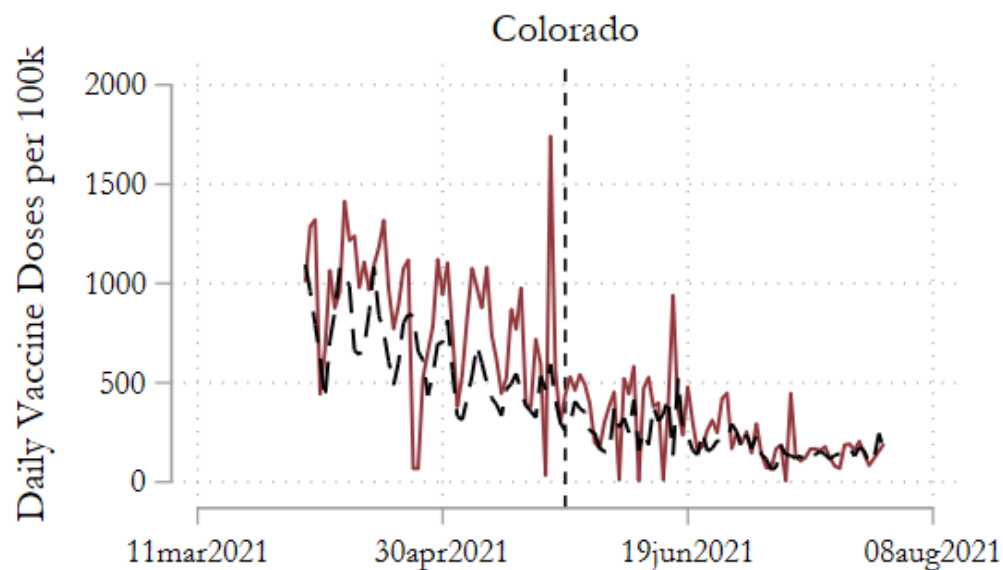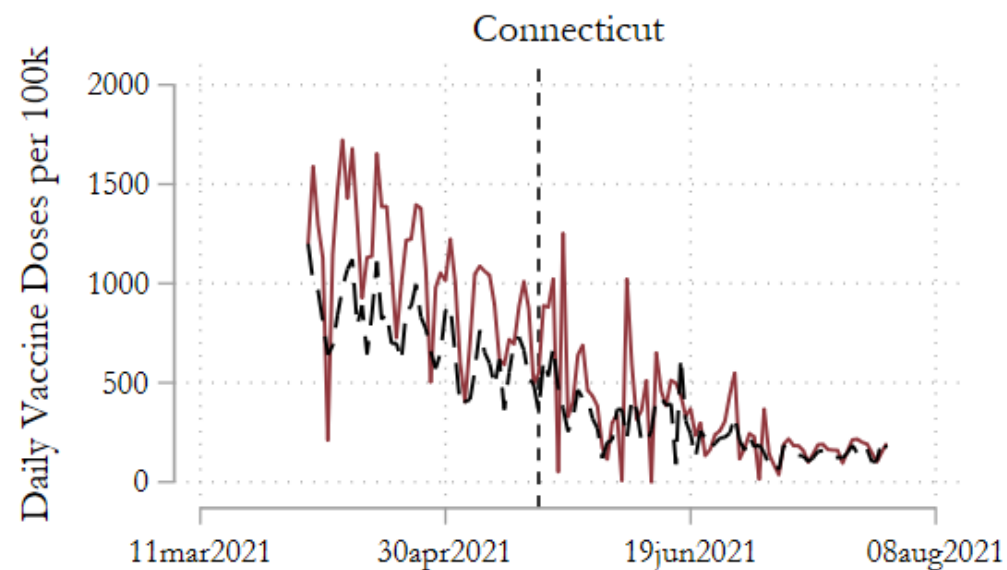

— treated state  
- - synthetic control state

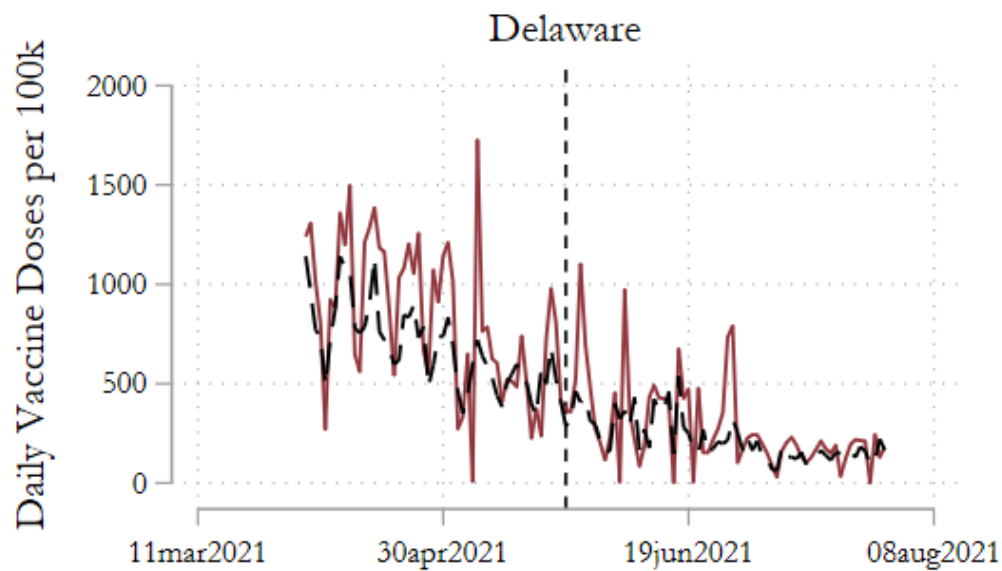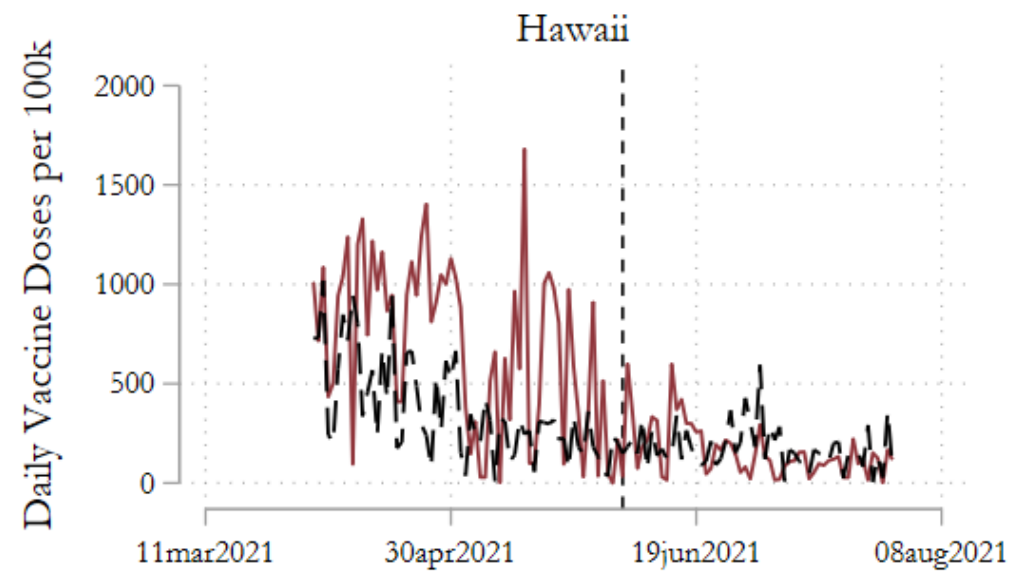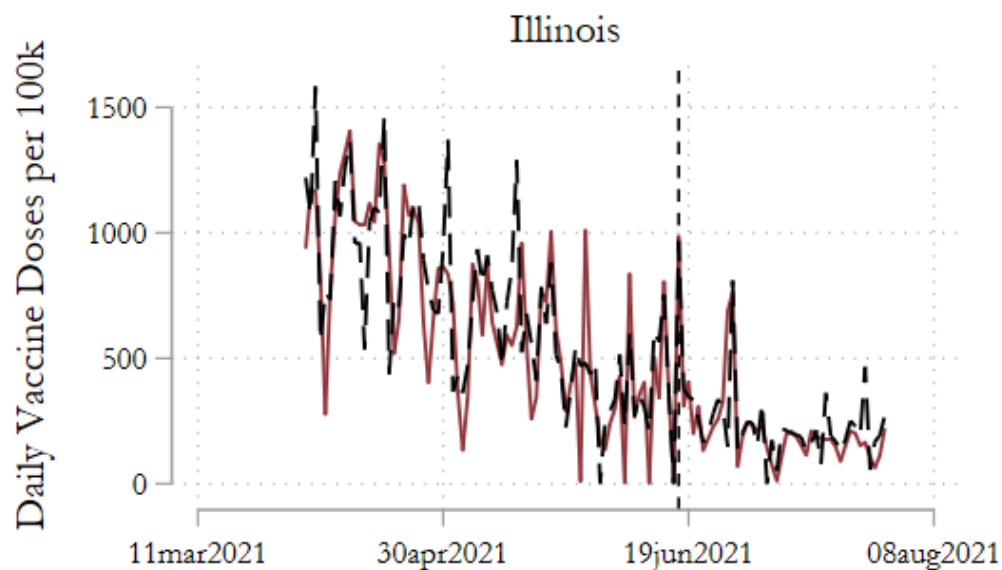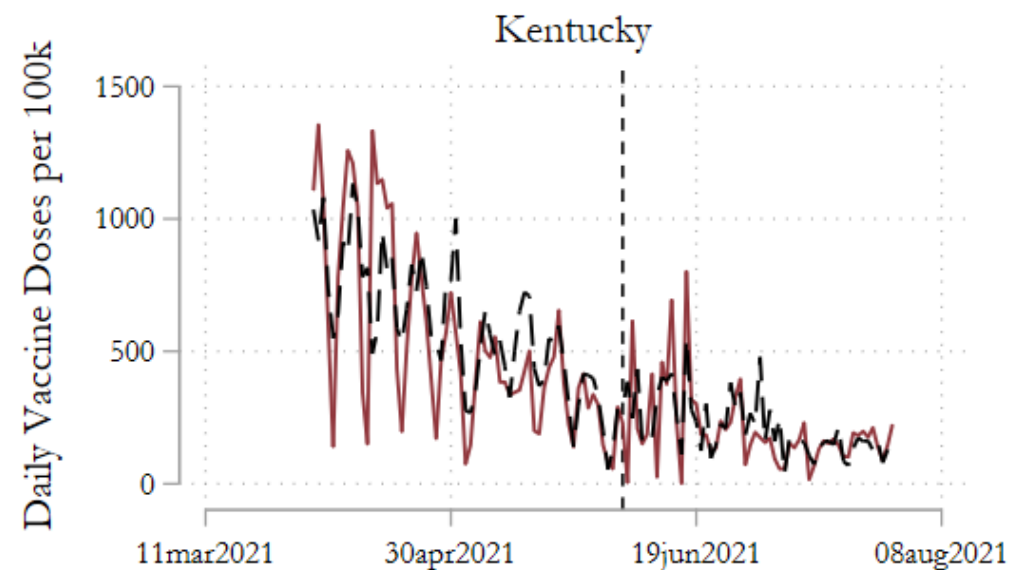

— treated state  
- - synthetic control state

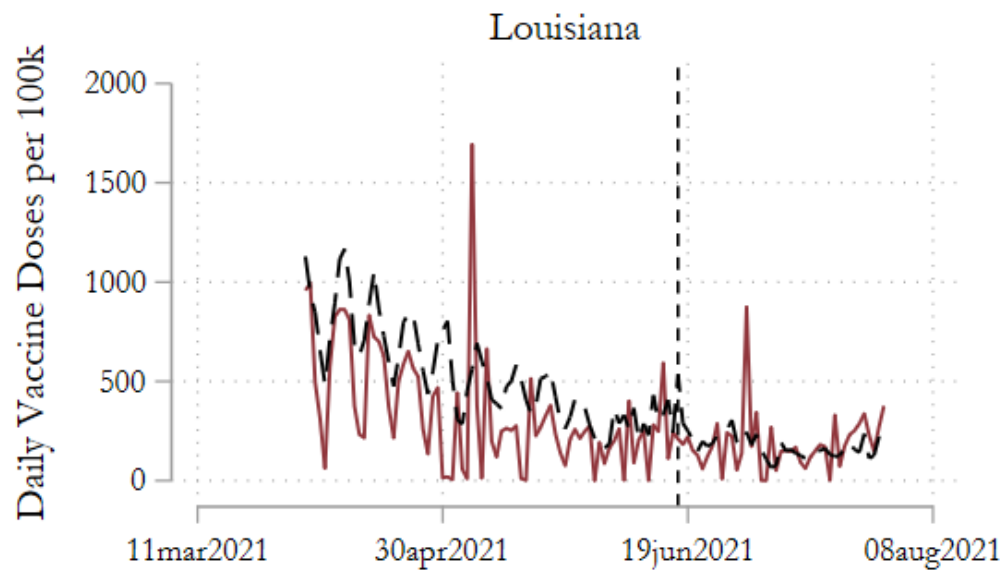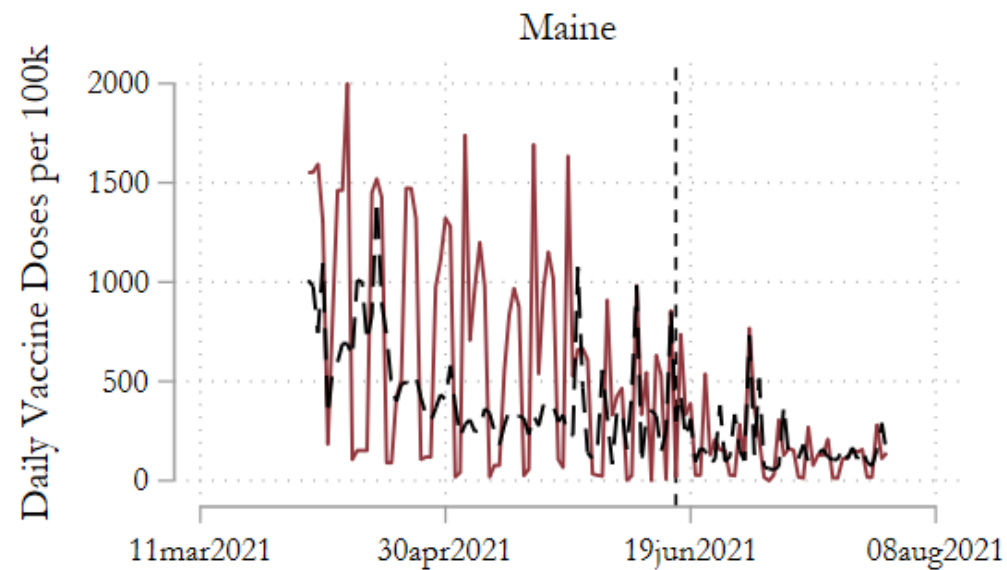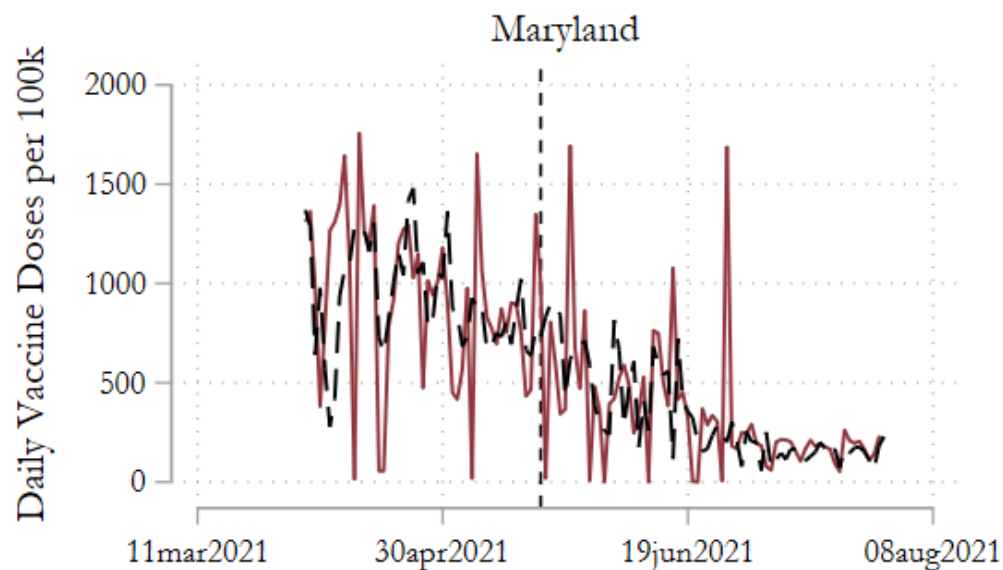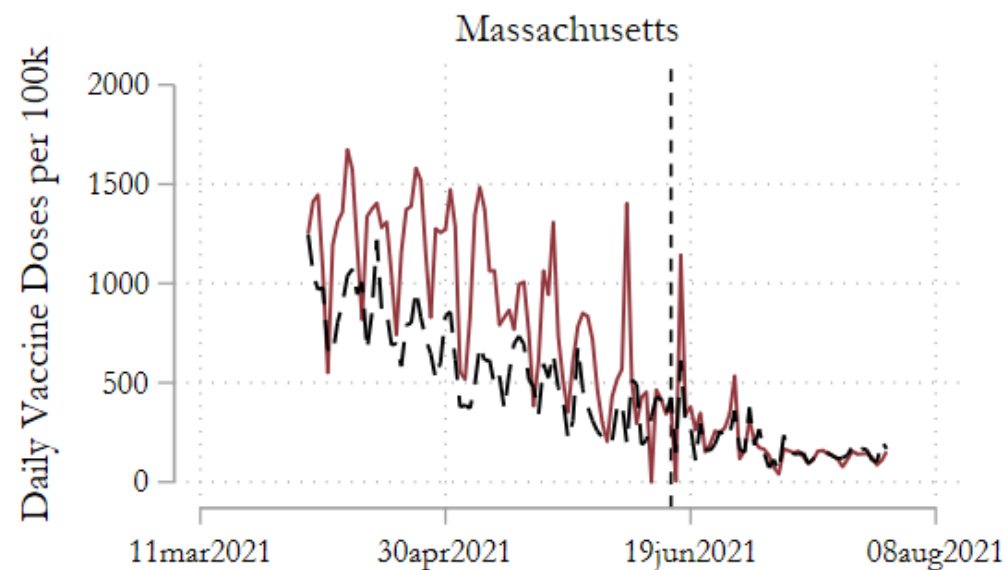

— treated state  
- - synthetic control state

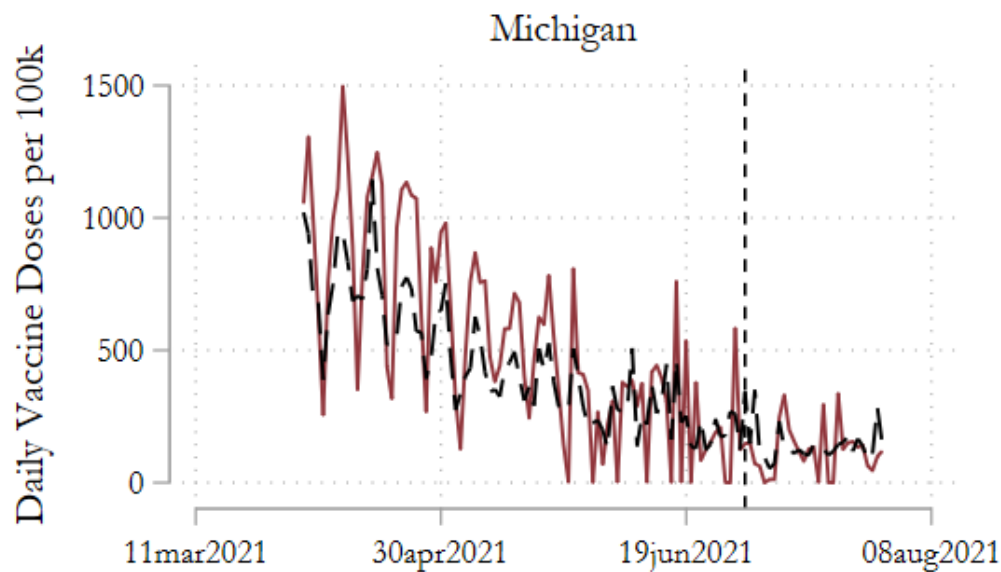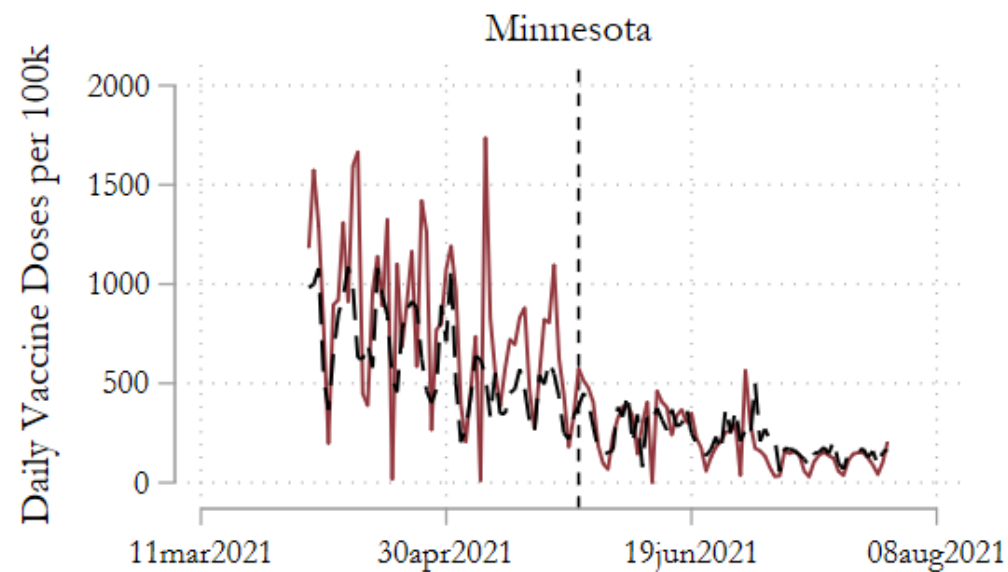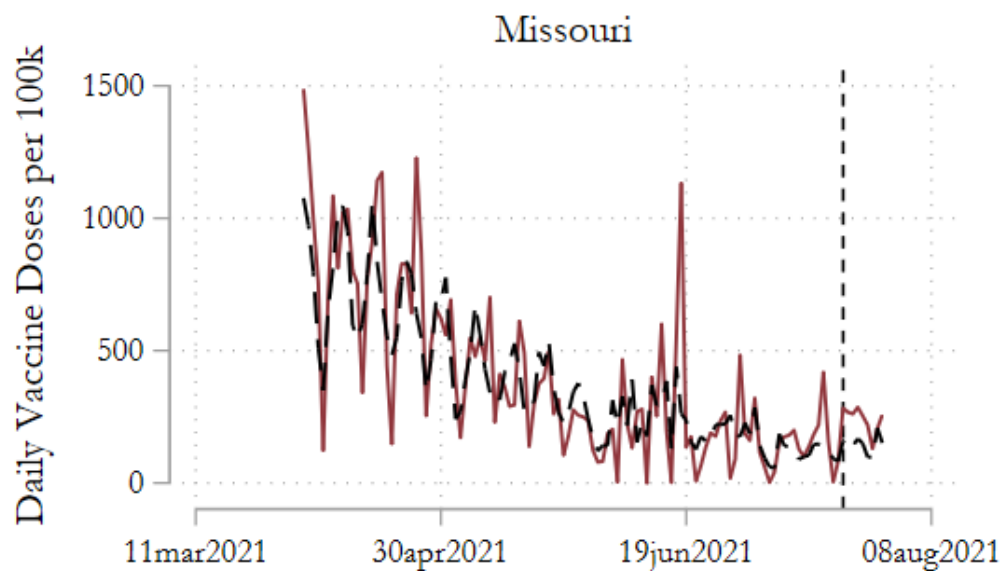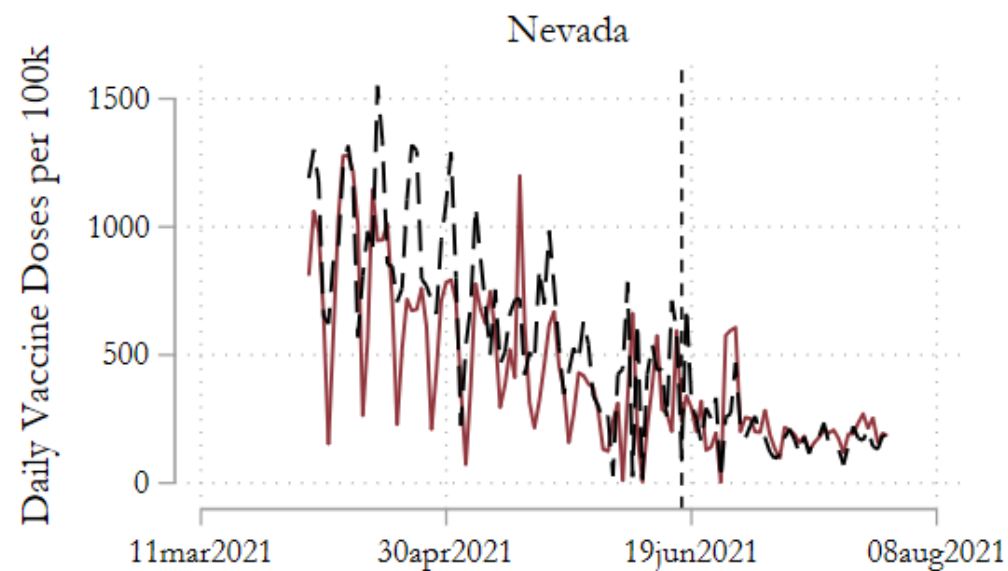

— treated state  
- - synthetic control state

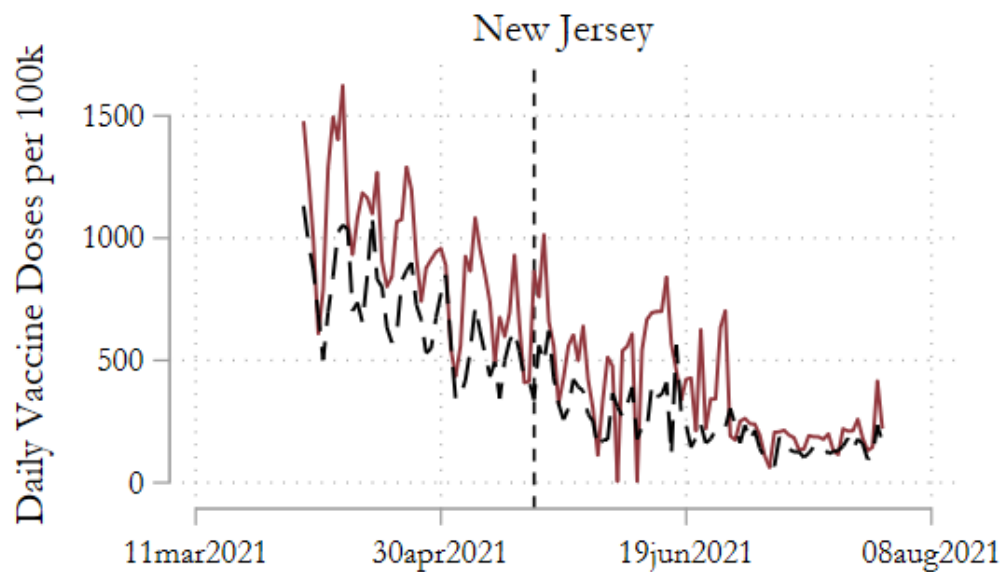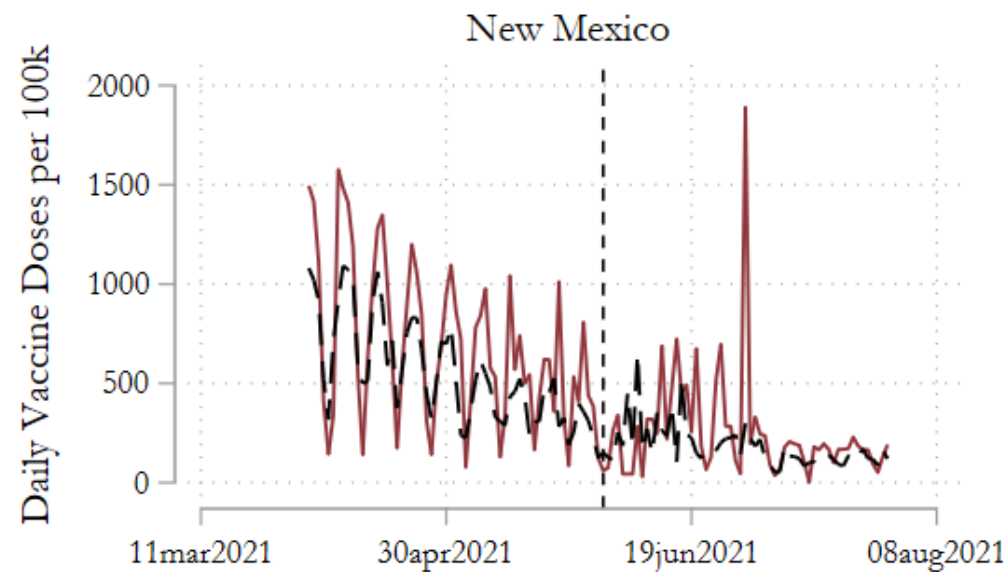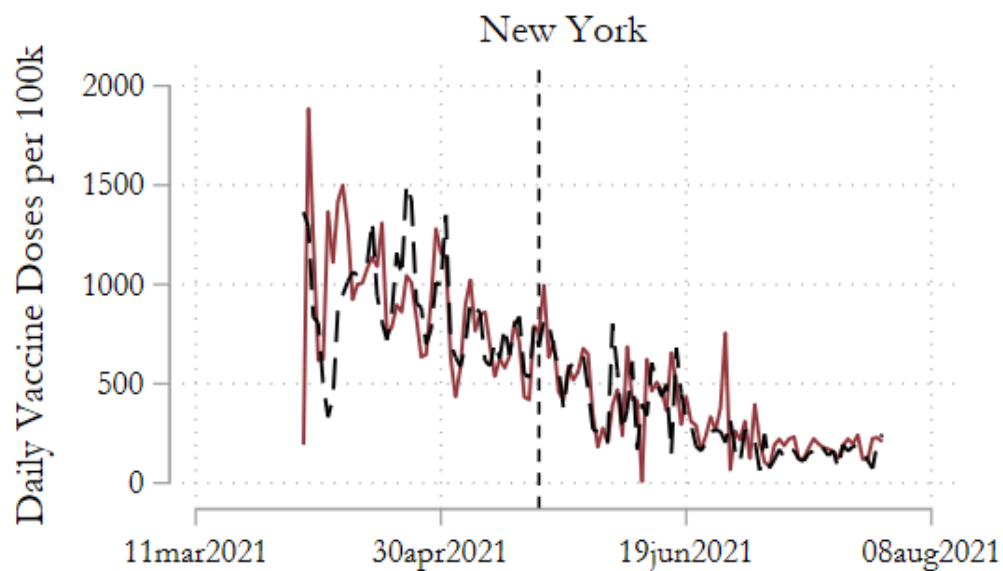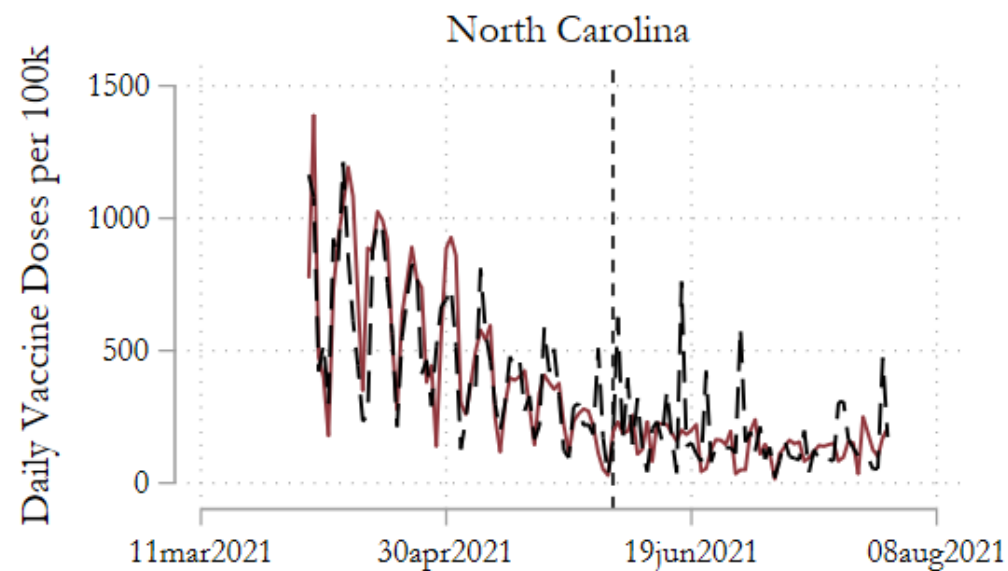

— treated state  
- - synthetic control state



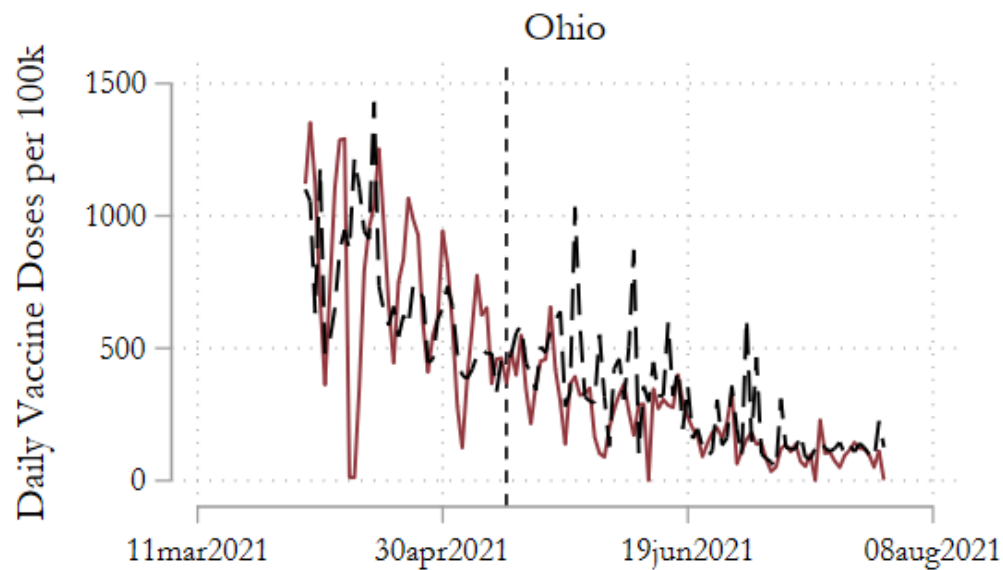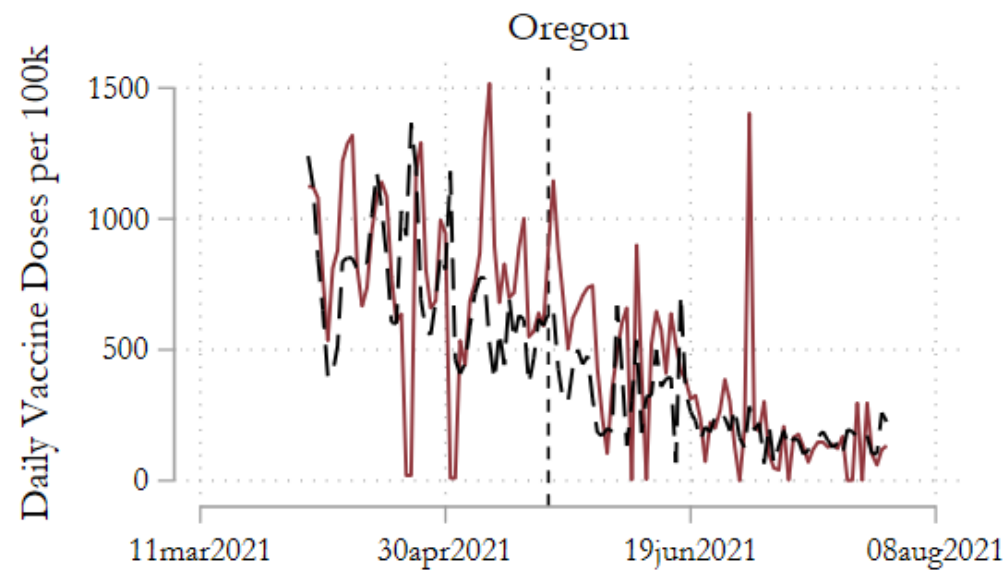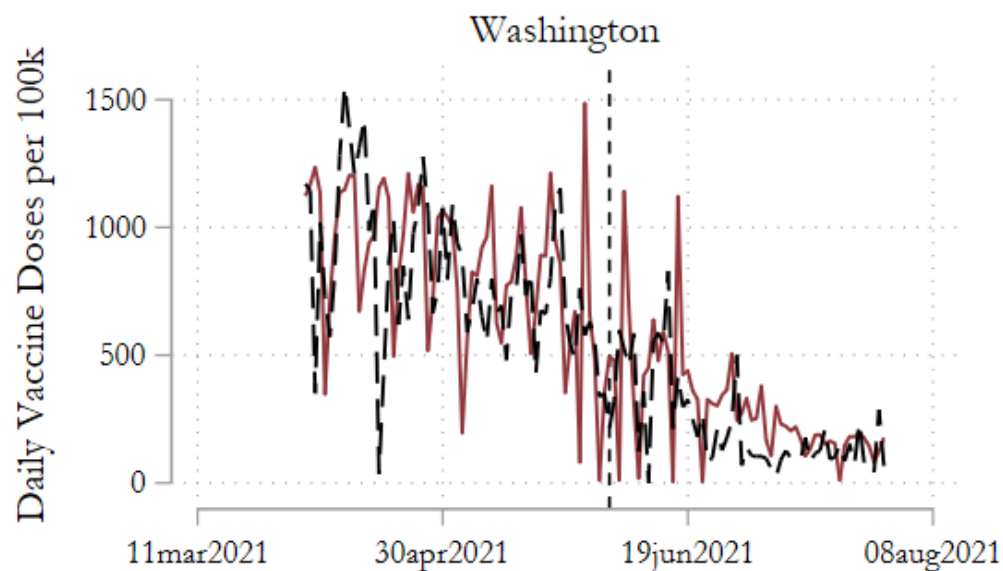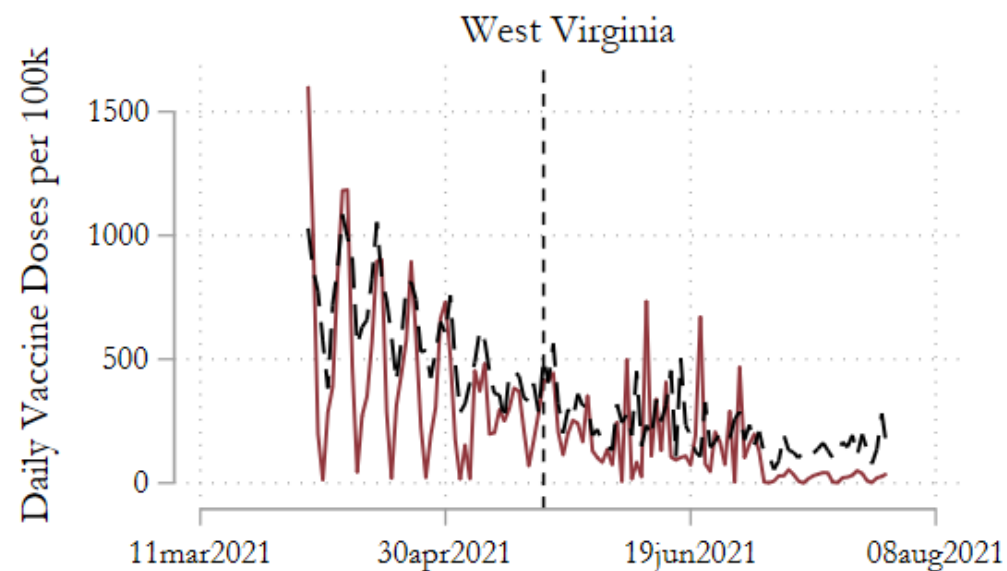

— treated state  
- - synthetic control state
